# Supplementary material for: Application of response surface methodology for silver nanoparticle stir bar sorptive extraction of heavy metals from drinking water samples: a Box–Behnken design
Source: Royal Society of Chemistry journal article supplement (doi:10.1039/c9an00165d), 2019-01-01
Supplement: c9an00165d1.pdf [file c9an00165d1.pdf]

**Supplementary data to:**

**Application of response surface methodology for silver nano-particle stir bar sorptive extraction of heavy metals from drinking water samples: a Box-Behnken design**

Sayyed Hossein Hashemi,<sup>\*a</sup> Massoud Kaykhaii<sup>b</sup> Ahmad Jamali Keikha<sup>c</sup> Zahra Sajjadi<sup>a</sup> and Majid Mirmoghaddam<sup>b</sup>

<sup>a</sup> Department of Marine Chemistry, Faculty of Marine Science, Chabahar Maritime University, Chabahar, Iran. Email: h\_hashemi\_85@yahoo.com

<sup>b</sup> Department of Chemistry, Faculty of Sciences, University of Sistan and Baluchestan, Zahedan, Iran.

<sup>c</sup> Department of Mechanical Engineering, Faculty of Marine Engineering, Chabahar Maritime University, Chabahar, Iran.

**Table SII.** Design matrix in the Box-Behnken model for the preconcentration of SNPSB

| A | B    | C   | D  | E  | F  | Peak area | Peak area | Peak area | Peak area | Observed R <sub>m</sub> | Predicted R <sub>m</sub> | Error  | Percent |
|---|------|-----|----|----|----|-----------|-----------|-----------|-----------|-------------------------|--------------------------|--------|---------|
| 3 | 0.06 | 0.4 | 10 | 20 | 15 | 47533     | 53913     | 39112     | 24876     | 0.79                    | 0.7018                   | 0.089  | 11.285  |
| 3 | 0.06 | 0.4 | 20 | 20 | 15 | 60973     | 66745     | 39473     | 28945     | 0.93                    | 0.8986                   | 0.029  | 3.094   |
| 3 | 0.08 | 0.2 | 15 | 20 | 10 | 56175     | 66541     | 15822     | 25102     | 0.76                    | 0.6573                   | 0.100  | 13.195  |
| 3 | 0.08 | 0.2 | 15 | 20 | 20 | 66307     | 72117     | 8724      | 32196     | 0.78                    | 0.8028                   | 0.038  | 4.558   |
| 3 | 0.08 | 0.4 | 10 | 15 | 15 | 48541     | 56385     | 41105     | 27132     | 0.83                    | 0.8109                   | 0.022  | 2.656   |
| 3 | 0.08 | 0.4 | 10 | 25 | 15 | 63611     | 71148     | 10060     | 27219     | 0.85                    | 0.8652                   | -0.073 | -9.208  |
| 3 | 0.08 | 0.4 | 20 | 15 | 15 | 48854     | 55960     | 40843     | 27219     | 0.83                    | 0.8780                   | -0.046 | -5.519  |
| 3 | 0.08 | 0.4 | 20 | 25 | 15 | 67440     | 84500     | 61335     | 43305     | 1.25                    | 1.1834                   | 0.065  | 5.214   |
| 3 | 0.08 | 0.6 | 15 | 20 | 10 | 69168     | 84935     | 62488     | 44817     | 1.27                    | 1.4244                   | -0.149 | -11.700 |
| 3 | 0.08 | 0.6 | 15 | 20 | 20 | 69821     | 86179     | 64308     | 43219     | 1.28                    | 1.4323                   | -0.154 | -12.051 |
| 3 | 0.1  | 0.4 | 10 | 20 | 15 | 72148     | 78203     | 51674     | 34273     | 1.12                    | 1.0340                   | 0.085  | 7.632   |
| 3 | 0.1  | 0.4 | 20 | 20 | 15 | 76261     | 82405     | 52662     | 36144     | 1.17                    | 1.2169                   | -0.045 | -3.852  |
| 4 | 0.06 | 0.2 | 15 | 15 | 15 | 105733    | 123940    | 94109     | 60020     | 1.85                    | 2.0688                   | -0.219 | -11.866 |
| 4 | 0.06 | 0.2 | 15 | 25 | 15 | 117742    | 159837    | 99543     | 65617     | 2.10                    | 2.3103                   | -0.205 | -9.754  |
| 4 | 0.06 | 0.4 | 15 | 15 | 10 | 110298    | 122522    | 96384     | 60822     | 1.88                    | 1.7264                   | 0.153  | 8.164   |
| 4 | 0.06 | 0.4 | 15 | 15 | 20 | 134472    | 169700    | 119056    | 73654     | 2.37                    | 2.1489                   | 0.223  | 9.405   |
| 4 | 0.06 | 0.4 | 15 | 25 | 10 | 130354    | 145645    | 101618    | 64545     | 2.10                    | 2.2663                   | -0.164 | -7.810  |
| 4 | 0.06 | 0.4 | 15 | 25 | 20 | 123386    | 138893    | 103816    | 72305     | 2.12                    | 2.0435                   | 0.082  | 3.848   |
| 4 | 0.06 | 0.6 | 15 | 15 | 15 | 134788    | 171023    | 116833    | 74081     | 2.37                    | 2.5447                   | -0.174 | -7.344  |
| 4 | 0.06 | 0.6 | 15 | 25 | 15 | 183222    | 213673    | 140819    | 92819     | 3.00                    | 2.7876                   | 0.208  | 6.951   |
| 4 | 0.08 | 0.2 | 10 | 20 | 10 | 101686    | 110340    | 77540     | 53534     | 1.64                    | 1.6531                   | -0.008 | -0.470  |
| 4 | 0.08 | 0.2 | 10 | 20 | 20 | 109386    | 117310    | 90807     | 56931     | 1.80                    | 1.9293                   | -0.133 | -7.397  |
| 4 | 0.08 | 0.2 | 20 | 20 | 10 | 104663    | 117238    | 86929     | 53441     | 1.73                    | 1.6348                   | 0.094  | 5.461   |
| 4 | 0.08 | 0.2 | 20 | 20 | 20 | 129898    | 144173    | 96359     | 65684     | 2.08                    | 2.0843                   | -0.006 | -0.307  |
| 4 | 0.08 | 0.4 | 15 | 20 | 15 | 240286    | 229984    | 199362    | 111543    | 3.73                    | 3.6568                   | 0.072  | 1.929   |
| 4 | 0.08 | 0.4 | 15 | 20 | 15 | 246224    | 265842    | 186743    | 100461    | 3.73                    | 3.6568                   | 0.074  | 1.993   |
| 4 | 0.08 | 0.4 | 15 | 20 | 15 | 201483    | 248712    | 176548    | 95231     | 3.40                    | 3.6568                   | -0.259 | -7.617  |
| 4 | 0.08 | 0.4 | 15 | 20 | 15 | 211269    | 211269    | 196346    | 120111    | 3.60                    | 3.6568                   | -0.055 | -1.532  |
| 4 | 0.08 | 0.4 | 15 | 20 | 15 | 232171    | 265842    | 191011    | 112473    | 3.80                    | 3.6568                   | 0.141  | 3.715   |
| 4 | 0.08 | 0.4 | 15 | 20 | 15 | 257002    | 257002    | 180574    | 98451     | 3.69                    | 3.6568                   | 0.035  | 0.958   |
| 4 | 0.08 | 0.6 | 10 | 20 | 10 | 183526    | 71706     | 65012     | 39163     | 1.64                    | 1.6955                   | -0.060 | -3.640  |
| 4 | 0.08 | 0.6 | 10 | 20 | 20 | 193757    | 86030     | 66383     | 39929     | 1.74                    | 1.7763                   | -0.033 | -1.913  |
| 4 | 0.08 | 0.6 | 20 | 20 | 10 | 199410    | 93656.4   | 60621     | 49400     | 1.84                    | 1.7744                   | 0.069  | 3.751   |
| 4 | 0.08 | 0.6 | 20 | 20 | 20 | 177590    | 129043    | 94978     | 55273     | 2.11                    | 2.0293                   | 0.084  | 3.961   |
| 4 | 0.1  | 0.2 | 15 | 15 | 15 | 154634    | 172305    | 112765    | 77673     | 2.46                    | 2.5794                   | -0.117 | -4.761  |
| 4 | 0.1  | 0.2 | 15 | 25 | 15 | 164066    | 166178    | 124900    | 73046     | 2.89                    | 2.7824                   | -0.284 | -11.378 |
| 4 | 0.1  | 0.4 | 15 | 15 | 10 | 101495    | 101850    | 65798     | 44601     | 1.48                    | 1.6062                   | -0.127 | -8.570  |
| 4 | 0.1  | 0.4 | 15 | 15 | 20 | 151827    | 157950    | 127096    | 77673     | 2.47                    | 2.3691                   | 0.100  | 4.050   |
| 4 | 0.1  | 0.4 | 15 | 25 | 10 | 238586    | 80046     | 55955     | 50291     | 1.93                    | 2.0697                   | -0.141 | -7.305  |
| 4 | 0.1  | 0.4 | 15 | 25 | 20 | 127586    | 148896    | 98758     | 65544     | 2.10                    | 2.1974                   | -0.100 | -4.759  |
| 4 | 0.1  | 0.6 | 15 | 15 | 15 | 120004    | 168469    | 126113    | 80024     | 2.40                    | 2.1149                   | 0.285  | 11.861  |
| 4 | 0.1  | 0.6 | 15 | 25 | 15 | 106025    | 173253    | 133523    | 85555     | 2.44                    | 2.2728                   | 0.174  | 7.092   |
| 5 | 0.06 | 0.4 | 10 | 20 | 15 | 110205    | 109587    | 104656    | 63694     | 1.90                    | 1.9339                   | -0.038 | -1.985  |
| 5 | 0.06 | 0.4 | 20 | 20 | 15 | 128096    | 101181    | 104503    | 62545     | 1.92                    | 1.9383                   | -0.014 | -0.744  |
| 5 | 0.08 | 0.2 | 15 | 20 | 10 | 156461    | 107936    | 106240    | 75208     | 2.17                    | 2.0497                   | 0.124  | 5.713   |
| 5 | 0.08 | 0.2 | 15 | 20 | 20 | 158871    | 206723    | 153169    | 92833     | 2.94                    | 2.6402                   | 0.297  | 10.104  |
| 5 | 0.08 | 0.4 | 10 | 15 | 15 | 120695    | 119656    | 70963     | 55041     | 1.73                    | 1.7202                   | 0.014  | 0.791   |
| 5 | 0.08 | 0.4 | 10 | 25 | 15 | 116108    | 102882    | 93252     | 65681     | 1.85                    | 1.6980                   | 0.155  | 8.383   |
| 5 | 0.08 | 0.4 | 20 | 15 | 15 | 183181    | 18604     | 66914     | 45228     | 1.49                    | 1.5535                   | -0.059 | -3.919  |
| 5 | 0.08 | 0.4 | 20 | 25 | 15 | 161888    | 76806     | 81554     | 47534     | 1.72                    | 1.8340                   | -0.110 | -6.402  |
| 5 | 0.08 | 0.6 | 15 | 20 | 10 | 102373    | 86982     | 60715     | 41672     | 1.38                    | 1.2987                   | 0.078  | 5.690   |
| 5 | 0.08 | 0.6 | 15 | 20 | 20 | 110347    | 95261     | 49624     | 43350     | 1.40                    | 1.5896                   | -0.192 | -13.744 |
| 5 | 0.1  | 0.4 | 10 | 20 | 15 | 117818    | 73103     | 72887     | 40696     | 1.44                    | 1.5596                   | -0.122 | -8.466  |
| 5 | 0.1  | 0.4 | 20 | 20 | 15 | 162186    | 79628     | 51897     | 35534     | 1.49                    | 1.5212                   | -0.034 | -2.316  |

**Table SI2.** ANOVA for preconcentration of heavy metals

| Source         | Sum of Squares        | df | Mean Square           | F Value | p-value Prob > F | PC%                   |
|----------------|-----------------------|----|-----------------------|---------|------------------|-----------------------|
| Model          | 2.15                  | 27 | 0.079                 | 37.89   | < 0.0001         |                       |
| A              | 0.34                  | 1  | 0.34                  | 160.21  | < 0.0001         | 15.78                 |
| B              | $3.14 \times 10^{-5}$ | 1  | $3.14 \times 10^{-5}$ | 0.015   | 0.90             | $3.14 \times 10^{-5}$ |
| C              | $6.12 \times 10^{-6}$ | 1  | $6.12 \times 10^{-6}$ | 0.0029  | 0.96             | $6.12 \times 10^{-6}$ |
| D              | 0.0055                | 1  | 0.0055                | 2.63    | 0.12             | 0.25                  |
| E              | 0.014                 | 1  | 0.014                 | 6.65    | 0.016            | 0.65                  |
| F              | 0.029                 | 1  | 0.029                 | 14.02   | 0.0009           | 1.35                  |
| AB             | 0.024                 | 1  | 0.024                 | 11.47   | 0.0023           | 1.11                  |
| AC             | 0.11                  | 1  | 0.11                  | 51.73   | < 0.0001         | 5.10                  |
| AD             | 0.0050                | 1  | 0.0050                | 2.37    | 0.14             | 0.23                  |
| AE             | 0.00033               | 1  | 0.00033               | 0.15    | 0.70             | 0.015                 |
| AF             | 0.0035                | 1  | 0.0035                | 1.66    | 0.21             | 0.16                  |
| BC             | 0.024                 | 1  | 0.024                 | 11.55   | 0.0022           | 1.11                  |
| BD             | $7.33 \times 10^{-5}$ | 1  | $7.33 \times 10^{-5}$ | 0.035   | 0.85             | $7.33 \times 10^{-5}$ |
| BE             | 0.00021               | 1  | 0.00021               | 0.10    | 0.75             | 0.0097                |
| BF             | 0.0037                | 1  | 0.0037                | 1.74    | 0.20             | 0.17                  |
| CD             | 0.00035               | 1  | 0.00035               | 0.17    | 0.69             | 0.016                 |
| CE             | $1.64 \times 10^{-5}$ | 1  | $1.64 \times 10^{-5}$ | 0.0078  | 0.93             | $1.64 \times 10^{-5}$ |
| CF             | 0.0027                | 1  | 0.0027                | 1.29    | 0.27             | 0.12                  |
| DE             | 0.0034                | 1  | 0.0034                | 1.64    | 0.21             | 0.16                  |
| DF             | 0.00098               | 1  | 0.00098               | 0.47    | 0.50             | 0.045                 |
| EF             | 0.013                 | 1  | 0.013                 | 6.34    | 0.018            | 0.60                  |
| A <sup>2</sup> | 0.80                  | 1  | 0.80                  | 383.66  | < 0.0001         | 37.13                 |
| B <sup>2</sup> | 0.076                 | 1  | 0.076                 | 36.37   | < 0.0001         | 3.53                  |
| C <sup>2</sup> | 0.046                 | 1  | 0.046                 | 21.97   | < 0.0001         | 2.13                  |
| D <sup>2</sup> | 0.31                  | 1  | 0.31                  | 146.33  | < 0.0001         | 14.39                 |
| E <sup>2</sup> | 0.093                 | 1  | 0.093                 | 44.33   | < 0.0001         | 4.32                  |
| F <sup>2</sup> | 0.25                  | 1  | 0.25                  | 121.70  | < 0.0001         | 11.60                 |
| Residual       | 0.054                 | 26 | 0.0021                |         |                  |                       |
| Lack of Fit    | 0.051                 | 21 | 0.0024                | 3.69    | 0.076            |                       |
| Pure Error     | 0.0033                | 5  | 0.00066               |         |                  |                       |
| Cor Total      | 2.20                  | 53 |                       |         |                  |                       |

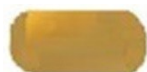

**Fig. S11.** Photo of silver nano-particle stir bar.

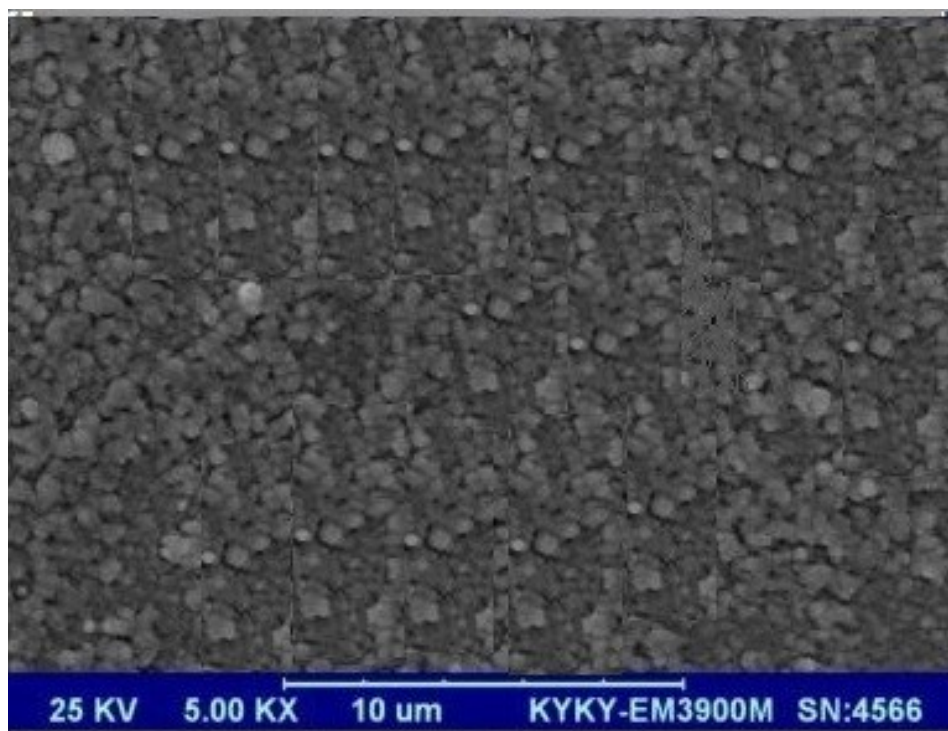

**Fig. S12.** SEM image of SNPSB after 60 extractions.
